# Supplementary material for: ClPIF3-ClHY5 Module Regulates ClPSY1 to Promote Watermelon Fruit Lycopene Accumulation Earlier under Supplementary Red Lighting
Source: MDPI journal article supplement (doi:10.3390/ijms23084145), 2022-04-08
Supplement: s1 [file s1]

*CLPSYI*-promoter-CDS:

TTTCTTTACCAACTAAGTTAAAATTTGAGTGGAATATTGATGAATCTTTTGAAGAATTTT  
AAGTATAATTTAGTTGATGAGACATATATACAAATTTTTTAGTTAAATAACTATATCCCCA  
CCCATTTTATCTTTAAAAATGGTCCGAAATTTTTGGTTTTATTCATATGTTTGAAACTACA  
TATTACTTAATTCATTGAAAAAAAAAACACATACTTAATTCAACAAATTAATTTTGATG  
TTAAATATCGAATATTATTTAATTGAATAGTGTGCCATAATACTCAATTAATTAACATTGTT  
AGTGTTCAAAAGAAAATTATGTACATAATACACAACTTAAACTAACAATTTACTTGAA  
ACTTAAATCCACTTGTTTAATATTCAAATAAATTAAATTTGAGCATTGTTCAAAAAATTA  
AAAAATGTAGGTTATTAGGTAAAAAGTTGAAGGTTCAAATTTACTTTGAGATTATTGT  
GTCCAACATAGAAACGTGGAAATCAAACTTTTTTTTTAAGAAAAAGAAACATAAAGT  
TGAATGCCACATGTTTAGACCCATTTAGAAAACATTGAAATTCAAAACAATGGTGATCC  
ACATTTGAAGTAATTGATTAAATTTATTCTTTTAAAGATTACGGTGGAAGTTGATTCT  
ATATGGTTAATTGTTTGTTTGTCTTTTCTTTTAACTCAAACATTTCAATTGTGTGTA  
TGCATGTCACATTTCACTACATCTTAAATAATGTTAAAATAAGTATAGAACTTATCTTATC  
AACCTCGAGATTAGAGATTCAATTTTTCATGCTATTTATTATTAGAAAAAGAATCAGATT  
AGTTGACCTATGATCAATGAATAACAGTTAATTACTTAACAATACTTCACCTTCCATGCA  
TACCTTCTAATCACAAAGAAGAAAAAACATTAAATTGCCAAAACAAAGGAGTTTGTT  
AGTGATTGGGAGATTTGGGGTTCGAATCTTCTAGTCTAAATATTAAAAGAAAGAAATA  
TATATTAATTTTTTTAAAAGGACAAATATACAAAGTGACAAATTTGGACATTTAGGGAAA  
ATTTCTTTTAACTCGAGATGGTATTTTCTTAATTTATTAGTGGATGAAAATTAAAAGA  
GCTTAAATCCAAAAGCTATATTTAATTGGGCAAGAAACAATTCTGACACTCTTCTTTGT  
CTCGGCTCCCATTCAAAAACAGAGCCGCAACTTGCATAAACTGGTTGTCTGGGATCAAG  
CAACCACACATTTTGCGGACCAAATTCTTCCAGCAACTACTAAGCTTCCATTAGAGCAA  
CCTTCCACCACCAAACCCAAAAAGCGCACACCACCCTCAATTCAATTCCTCCCACTAAA  
AAGCACCCAATTCTATCAAACCTTCAAACAGAGTCCCCCNNTGACCACAC  
CCCCCCCCCCCCCTTCCCTTGATCTCTCTGCTTCGTTGCTGTTCTTCAACAATCG  
TAAGTGATTCTGTTCTTACATCATGTAATACCTTCCTGTTTTTGCTTTCCATTCTGGTATG  
TTTCGTCAGATTCTGGGAGATTGTTTTCTTTTATCTTTAGTCAAAATTCATGACGAA  
AGAAACCGACCCTTTTCCACTTACCCCTCAAAAAGAGAAACAGTGAAGTGAAGCTTTCA  
CATTTTCTGCCCTTTCTTGAGGATTATGATCATGTGGGTGTTTGGTATTTGTTGGTTATGC  
TGTTTATTTTTATACCCACGCAATCGGGTTCTTATATTAATTTATTCTAGTCCATATCGGGC  
GTATTTTTTTAAGTATATTTTTCGACGAATTACAGGCGCGATACAAAAGAGAAGCTAAG  
TGGGAGTTTCTCCGTGTCGAAGCATTGCTTAGAATTTCTTGGGCGGTTCAATTGGATT  
TAAGTTGTTTTTTCTTTTCTATTTCAATTTGCGACTGGGTTTCTCGATTCTCTGCGATT  
CGTTCATAAAATTCTTCGAATCGATTGATA

*CIHY5*-CDS:

ATGCAGGAGCAAGCCACGAGTTCAGCCGCTGCTAGTTCTCTGCCTTCCAGCAGTGAAA  
GATCCTCCAGCTCTGCTCTTCATCTCGAAGTTAAAGAAGGAATGGAGAGCGATGAGGA  
GATCCGAAGAGTGCCGGAGATAGGCGGTGAATCGGCGGGAACATCCGCTTCCGGGAG  
GGATACTGGTTCGGTTGCCGGTCCGGACCGGGTTCAAGTTTCTCGGGAGGGTCAAAGG  
AAAAGAGGGGAGAAGTCCGGCTGATAAAGAAAGCAAGAGACTGAAGAGATTGCTGAG  
GAATAGAGTATCGGCACAGCAAGCGAGGGGAGAGAAAAAAGGCATATTTGAATGACTTA  
GAGATAAGGGTGAAGGATTTGGAGAAGAAGAACTCAGAACTTGAAGAAAGGCTTTCC  
ACTTTACAAAATGAGAATCAGATGCTTAGACAAATTTTGAAGAACACAACGGCAAGTA  
GGAGAAGTGGTGAGTGA

*CIPIF3*-CDS:

ATGCCTTTATCTGAGCTTTATCGTGTGGCCAGAGGGAAGCTTGATTGCACTCAAGACAA  
GAACAACATGGTTGCTTCTGATTTATCTATGAATCCTGAGAATGACGTTTTTCGAGCTGG  
TGTGGGAGAATGGCCAAATTTTGGCTGCAGGGCCAGTCCAATAGGACCAGGAAGTTAAA  
CACTTCACAGGCTCAATGTTTACCATCTCATAGTCCCAGGGATAGAGATAGAGATGTAG  
GATATTTCAACAATGCAAAGATGGTAAAGTTTGGGGCTATTGATTCTGTAGTAAGAGAT  
GTTATGTCAACGGCCCCCTTCGCCGGACGTCGAATTGGCTCATGATGATGATGATGATAT  
GGTGCCTTGGCTAAGTTATCCTCTTGATGGACATCTGCAACACGATTATTCTTCTGATTT  
CTTACCTGAATTATCTGGGGTCACTGTTAATGACTTTTCCTCACGCAATAGCATTGCATC  
TTCTATAGGCAAAGCTAGTGGTGGTAATCAGGTAAACAGAGAGAAAGACATGCACCTA  
AATCTTTGCACGGTGCTAATCTAGAAGATGGCAATAATTCTAAGCTTTCTTCATTAGAT  
GTTTCAACTACTAGACCTAGAAGTAGCATGAACCAATTACATTCATCAGCATCCAGCA  
AATCCAGACATCATTCCACATCTCAGAACAAAATGCACTGGGGGCACTGAAAGTACT  
ACAGACAAGATTCTCCATGATTCTTGTGGGGCACTCTCCTCAGGTTCCATCGATTGC  
AAGCAGTTCTTCAAGCACAGCAAAGCAAAAGCTAGATCCAACCTCCAAGTAATTCA  
TCTAATGTCATAAATTTCTCCCATTTTCTGCGACCTGCTGCTCTTCTCAAATCCAGTCCT  
CAAAACCATGGTGTCCCTGGAACCTGGAGGTTTCGCGCAATTTGGACAGCGTGGTTAAGA  
ACTGCTCGGCAGTTAATAAGCAAACCCATGAATCATCATTAAATTGTAACCTCGAGGTGGT  
ATAAGAAATGAATCAAATTCATGTTGTAAAAATGCGGTAGTGCCTTCCATAGATGGTAA  
AAATCCATCAGATGGCAAGCCTCCTGAGCAATCACAGGCTAATAAACAGCCTGAGGTT  
GCTTGTTTAGGAGATTGAGCCGATCACGATGACCGCCTCAAACATTGCTTGAAGTTGG  
TGCGACAAAAGGATTGCCAGATAGTGAGAAGGGTGTGAATCTATAATTGCCGCTTCC  
GTTTGTTACGGAATAGCGTGGAGGGAGCTTCTGATGATTTACCACCAAATAGGAAGA  
GAAAATGTCATGACACTGAGGATTCTGAATGGCACAGTGATGATGTAGAAGAAGAATG  
CAATGATGTGAAGAGAGTGACTTCTGCTCGAGGAACTGGTTCAAAAAGAAGTAGGGC  
AGCAGAAGTGCATAATTTATCAGAAAGACGACGTAGAGATAGGATCAATGAGAAGATG  
CGTGCACTGCAAGAGCTTATACCAAATTGTAATAAGGTCGACAAAGCTTCCATGCTTGA  
TGAAGCCATTGAGTACTTGAAAACGCTTCAACTTCAGGTTTCAAGTTATGTCAATGGGA  
GCTGGTTTGTTCATGCCTCCTGTGATGTTCCCCGGAGGAATGCCACCCATGAATGCACC  
CCACATTTACCCACCCATGGGTATAGGAATGGGAATGGGAATGGGATTTGGGATAGGTA  
TGCCAGACATGAATGGTGGTTCTCCTGGTTTTCCCATGGTTCAAGTGCCACACATGCAA  
GGAATGCATTTCCCCGGCCCATCTATACCAGCTCAAACCTGTAATGCATGGATTGCCAAG

TTCTAACTTTCAGGTTCTTGGACTTCCTGGTCAAGGACTTCCCATGCCCATGCCACGTG  
GACCGATTGCCCCATTTTCTGGAGGGCCTTTTATGACTAATTCCAGTGTGGCAGCAGCT  
CCTGTGGAGAATTTTGGTTCAGCTGCAGCCTCTACCTCGAAAGATGCATCTCCAAACAT  
TAATTCACCCATGGTGCCAAATGGTGGCACCGACCCTTCAATTACTCCAGCTCTTAGAC  
AGGCTAATGAACAAGCTTCCTGTGTTAATGACAGCGGTGTGAATCCCACCACCAAAAA  
CGACCTTATAGCTAACTAA
